# Supplementary material
Source: ML conference proceedings conference paper supplement (https://aclanthology.org/2020.conll-1.23)
Supplement: OptionalSupplementaryMaterial [file 2020.conll-1.23.OptionalSupplementaryMaterial.zip]

Archive with 1 entries (1 files):
- CONLL2020_CAMERA_READY_APPENDIX.pdf
